# Supplementary material for: A Novel Iridovirus Discovered in Deep-Sea Carnivorous Sponges
Source: MDPI journal article supplement (doi:10.3390/v14081595), 2022-07-22

# A novel iridovirus discovered in deep-sea carnivorous sponges

Marta Canuti, Gabrielle Large, Joost T.P. Verhoeven and Suzanne C. Dufour

## Supplementary Material

**Table S1. Primers used in this study.**

| Segment                         | Primer       | Sequence                | Position <sup>1</sup> |
|---------------------------------|--------------|-------------------------|-----------------------|
| <b>MCP amplification</b>        |              |                         |                       |
| Screening                       | Irido_ScF    | GGTAGGATTCGCTGGACTC     | 74,942-74,960         |
|                                 | Irido_ScR1   | ACCTGCTCGATGAGGATGTC    | 74,437-74,456         |
|                                 | Irido_ScR2   | CAGACCTGGATGTTGGTGAG    | 74,515-74,534         |
| 5' sequencing                   | Irido_MCP-F1 | CTTTACTACTGACCAATCATCC  | 74,389-74,410         |
|                                 | Irido_ScR1   | ACCTGCTCGATGAGGATGTC    | 74,437-74,456         |
|                                 | Irido_ScR2   | CAGACCTGGATGTTGGTGAG    | 74,515-74,534         |
| 3' sequencing                   | Irido_MCP-F2 | TCCGTAACCTGGAACGAGCTG   | 74,622-74,641         |
|                                 | Irido_MCP-F3 | GCTCATTCTCGACAACAGCG    | 74,603-74,622         |
|                                 | Irido_MCP-R1 | CACTTAGCAGTTAGATCGATGTG | 73,777-73,799         |
| <b>Scaffold connecting PCRs</b> |              |                         |                       |
| Connection A to B               | IridoA_F1    | CCTATCTACAGGGAGACGTC    | 60,003-60,022         |
|                                 | IridoB_R1    | GTGCAAGACCAAGTGGCAAC    | 60,304-60,323         |
|                                 | IridoA_F2    | TTGGGCATCCTCAGTTCACC    | 60,037-60,056         |
| Connection B to C               | IridoB_F1    | TTCGTCGAGCTTGCGTAGC     | 87,104-87,122         |
|                                 | IridoC_R1    | TCAGTGGAGGCTGTAGCTTC    | 88,808-88,827         |
|                                 | IridoB_F2    | CAGCTGTTAGTTTCAAAGACATC | 87,136-87,158         |
| Connection C to D               | IridoC_F1    | TCTTCTATCATATCGCCCAGG   | 124,087-124,107       |
|                                 | IridoD_R1    | GCCGATAGTCTTAACACCAGC   | 124,880-124,900       |
|                                 | IridoC_F2    | GCGAACATCTTGACCTCCTC    | 124,126-124,145       |
| Connection D to E               | IridoD_F1    | TGCGTGCTCACCGTTCATC     | 152,053-152,071       |
|                                 | IridoE_R1    | GTCATCTGTTGAGATGCAAGG   | 152,754-152,774       |
|                                 | IridoD_F2    | AAATGGAAGACCTTCGAGTCC   | 152,108-152,128       |
| Connection E to A               | IridoE_F1    | AGTACCAGGTCTTATCGTCAG   | 190,027-190,047       |
|                                 | IridoA_R1    | GCCGATGTAGGCAAACCTGAAG  | 486-506               |
|                                 | IridoE_F2    | ACGGGTAAGATGACCAAGGC    | 190,095-190,114       |
|                                 | IridoA_R2    | CAGGTTGATGAGAACAAGACC   | 447-467               |

<sup>1</sup>Referred to strain CaSpA-IV MJ4 (Accession number ON887238).

**Table S2. Sequences used for the phylogenetic analysis of iridoviruses (Figure 3).**

| <b>Virus name</b>                           | <b>Abbreviation</b> | <b>Accession number</b> |
|---------------------------------------------|---------------------|-------------------------|
| Carnivorous sponge-associated iridovirus    | CaSpA-IV            | ON887238                |
| Cherax quadricarinatus iridovirus           | CQIV                | MF197913                |
| Shrimp hemocyte iridescent virus            | SHIV                | MF599468                |
| Invertebrate iridescent virus 31            | IIV-31              | HF920637                |
| Invertebrate iridescent virus 6             | IIV-6               | AF303741                |
| Lizard–cricket iridovirus                   | Liz-CrIV            | MN081869                |
| Daphnia iridescent virus 1                  | DIV-1               | ERP020955               |
| Invertebrate iridescent virus 3             | IIV-3               | DQ643392                |
| Anopheles minimus iridovirus                | AMIV                | KF938901                |
| Invertebrate iridescent virus 30            | IIV-30              | HF960234                |
| Invertebrate iridescent virus 22            | IIV-22              | HF920633                |
| Invertebrate iridescent virus 25            | IIV-25              | HF920635                |
| Invertebrate iridescent virus 9             | IIV-9               | GQ918152                |
| Scale drop disease virus                    | SDDV                | KR139659                |
| European chub iridovirus                    | ECIV                | MK637631                |
| Infectious spleen and kidney necrosis virus | ISKNV               | AF371960                |
| Large yellow croaker iridovirus             | LYCIV               | AY779031                |
| Rock bream iridovirus                       | RBIV                | AY532606                |
| Orange spotted grouper iridovirus           | OSGIV               | AY894343                |
| Lymphocystis disease virus 1                | LCDV-1              | L63545                  |
| lymphocystis disease virus China            | LCDV-C              | AY380826                |
| lymphocystis disease virus Sparus aurata    | LCDV-Sa             | KX643370                |
| Grouper iridovirus                          | GIV                 | AY666015                |
| Singapore grouper iridovirus                | SGIV                | AY521625                |
| Doctor fish virus                           | DFV                 | Unpublished             |
| Guppy virus 6                               | GV6                 | Unpublished             |
| Largemouth bass virus                       | LMBV                | DQ159940                |
| European catfish virus                      | ECV                 | KT989834                |
| European sheatfish virus                    | ESV                 | JQ724856                |
| Epizootic hematopoietic necrosis virus      | EHNV                | FJ433873                |
| Short-finned eel ranavirus                  | SERV                | KX353311                |
| Andrias davidianus ranavirus                | ADRV                | KC865735                |
| Pike-perch iridovirus                       | PPIV                | KX574341                |
| Frog virus 3                                | FV3                 | AY548484                |
| Bohle iridovirus                            | BIV                 | KX185156                |
| Common midwife toad virus                   | CMTVM               | JQ231222                |
| Tortoise ranavirus                          | TORV                | KP266743                |
| Cod iridovirus                              | CoIV                | KX574342                |
| Ranavirus maximus                           | Rmax                | KX574343                |
| Ambystoma tigrinum virus                    | ATV                 | AY150217                |

**Table S3. Sequences used for the phylogenetic analysis of iridoviral major capsid protein (Figure 4).**

| Virus name                               | Abbreviation | Animal in which the strain was identified         |                |               |                               |                       | Accession number |
|------------------------------------------|--------------|---------------------------------------------------|----------------|---------------|-------------------------------|-----------------------|------------------|
|                                          |              | Name                                              | Subphylum      | Order         | Environment                   | Area                  |                  |
|                                          |              | Arthropods                                        |                |               |                               |                       |                  |
| Cherax quadricarinatus iridovirus        | CQIV         | <i>Cherax quadricarinatus</i> (crayfish)          | Crustacea      | Decapoda      | Freshwater                    | China                 | MF197913         |
|                                          |              | <i>Cherax quadricarinatus</i> (crayfish)          | Crustacea      | Decapoda      | Freshwater                    | Taiwan                | MW039594         |
| Shrimp hemocyte iridescent virus         | SHIV         | <i>Litopenaeus vannamei</i> (prawn)               | Crustacea      | Decapoda      | Marine                        | China                 | MF599468         |
|                                          |              | <i>Litopenaeus vannamei</i> (prawn)               | Crustacea      | Decapoda      | Marine                        | Taiwan                | MW039595         |
| Sergestid iridovirus                     | SIV          | <i>Acetes erythraeus</i> (prawn)                  | Crustacea      | Decapoda      | Marine                        | Madagascar            | EF467167         |
| Daphnia iridescent virus 1               | DIV-1        | <i>Daphnia magna</i> (water flea)                 | Crustacea      | Anomopoda     | Freshwater/<br>Brackish water | Finland               | ERP020955        |
| Invertebrate iridescent virus 9          | IIV-9        | <i>Galleria mellonella</i> (moth)                 | -              | Lepidptera    | Land                          | New Zealand           | GQ918152         |
| Invertebrate iridescent virus 25         | IIV-25       | <i>Simulium</i> sp. (black fly)                   | -              | Diptera       | Land                          | Wales                 | HF920635         |
| Invertebrate iridescent virus 30         | IIV-30       | -                                                 | -              | -             | -                             | -                     | HF920636         |
| Invertebrate iridescent virus 22         | IIV-22       | <i>Simulium</i> sp. (black fly)                   | -              | Diptera       | Land                          | Wales                 | HF920633         |
| Costelytra zealandica iridescent virus   | CzIV         | <i>Costelytra zealandica</i> (grub)               | -              | Coleoptera    | Land                          | New Zealand           | AF025775         |
| Tipoula iridescent virus type 1          | TIV          | <i>Galleria mellonella</i> (moth)                 | -              | Lepidptera    | Land                          | -                     | M33542           |
| Simulium sp. iridescent virus            | SsIV         | <i>Simulium</i> sp. (black fly)                   | -              | Diptera       | Land                          | -                     | M32799           |
| Invertebrate iridescent virus 3          | IIV-3        | <i>Ochlerotatus taeniorhynchus</i> (mosquito)     | -              | Diptera       | Land                          | USA                   | DQ643392         |
| Anopheles minimus iridovirus             | AMIV         | Anopheles minimus (mosquito)                      | -              | Diptera       | Land                          | China                 | KF938901         |
| Invertebrate iridescent virus 31         | IIV-31       | <i>Armadillidium vulgare</i> (pill-bug)           | Crustacea      | Isopoda       | Land                          | USA                   | HF920637         |
|                                          |              | <i>Armadillidium vulgare</i> (pill-bug)           | Crustacea      | Isopoda       | Land                          | Japan                 | AB686457         |
|                                          |              | <i>Burmoniscus okinawaensis</i> (pill-bug)        | Crustacea      | Isopoda       | Land                          | Japan                 | AB686462         |
|                                          |              | <i>Porcellio scaber</i> (woodlouse)               | Crustacea      | Isopoda       | Land                          | Japan                 | AB686461         |
|                                          |              | <i>Ligidium koreanum</i> (woodlice)               | Crustacea      | Isopoda       | Land                          | Japan                 | AB686458         |
| Invertebrate iridescent virus Kaz        | Kaz          | -                                                 | -              | -             | -                             | Kazakhstan            | MT862761         |
| Cricket iridovirus                       | Cr-IV        | <i>Gryllodes sigillatus</i> (cricket)             | -              | Orthoptera    | Land                          | USA                   | OK181107         |
| Daphnia iridescent virus 1               | DIV-1        | <i>Daphnia magna</i> (plankton)                   | Crustacea      | Anomopoda     | Freshwater                    | Finland               | ERP020955        |
|                                          |              | Non-arthropods                                    |                |               |                               |                       |                  |
| Carnivorous sponge-associated iridovirus | CaSpA-IV     | <i>Chondrocladia grandis</i> (carnivorous sponge) | Demospongiae   | Cladorhizidae | Marine                        | Arctic/Atlantic Ocean | ON887238         |
| Erythrocytic necrosis virus              | ENV          | Chinook salmon                                    | Actinopterygii | Salmonidae    | Marine,<br>Freshwater         | Canada                | MK638677         |

|                                         |          |                                        |          |                |      |               |          |
|-----------------------------------------|----------|----------------------------------------|----------|----------------|------|---------------|----------|
| Rhinella marina erythrocytic-like virus | RMEV     | <i>Rhinella marina</i> (cane toad)     | Amphibia | Bufonidae      | Land | French Guiana | MW582935 |
| Lizard-cricket iridovirus               | Liz-CrIV | <i>Trioceros hoehnelii</i> (chameleon) | Reptilia | Chamaeleonidae | Land | Germany       | MN081869 |

**Table S4. Overview of the shot-gun sequencing runs.**

| Sample | Treatment              | N reads    | N reads mapped to CaSpA-IV | Percentage of mapped reads | Average coverage |
|--------|------------------------|------------|----------------------------|----------------------------|------------------|
| Stem   | Methylated DNA removed | 9,492,444  | 22,782                     | 0.24%                      | 16.7X            |
| Sphere | Untreated              | 7,529,438  | 46,669                     | 0.62%                      | 35X              |
| Total  | -                      | 17,021,882 | 69,451                     | 0.41%                      | -                |

**Table S5. “Non-viral” contigs obtained from environmental samples that showed homology to CaSpA-IV.**

| Denomination in NCBI                | Accession number | Length | Number of proteins in the contig similar to iridoviruses | CaSpA-IV matching ORFs |
|-------------------------------------|------------------|--------|----------------------------------------------------------|------------------------|
| Nitromonadales sp.                  | SPBV01000186     | 3,986  | 3                                                        | 168, 009, 010          |
|                                     | SPBV01000271     | 2,740  | 1                                                        | 065                    |
|                                     | SPBV01000285     | 2,580  | 1                                                        | 004                    |
|                                     | SPBV01000286     | 2579   | 2                                                        | 069, 064               |
|                                     | SPBV01000293     | 2,470  | 2                                                        | 012, 011               |
|                                     | SPBV01000295     | 2,432  | 4                                                        | 016, 176, 177, 178     |
|                                     | SPBV01000328     | 2,135  | 2                                                        | 046, 047               |
| Pelagibacteraceae bacterium TMED237 | NHKI01000013     | 33,658 | 2                                                        | 0024                   |
|                                     | NHKI01000014     | 24,216 | 6                                                        | 159, 013, 021          |

**Figure S1. Phylogenetic analysis of proteins encoded by the core genes common to all iridoviruses.** The maximum likelihood phylogenetic trees were built with separate alignments of the 20 predicted protein sequences encoded by the 20 core genes listed in Table 1 that were concatenated to build the tree in Figure 3. Each tree is identified according to the gene locus in CaSpA-IV. Trees were built with IQ-Tree 2 using the best fit models identified with the ModelFinder function (168R: JTT+F+I+G4; 161R: LG+I+G4; 065R: VT+I+G4; 013R: LG+F+R4; 131L: LG+I+G4; 183R: LG+I+G4; 004R: LG+I+G4; 084L: LG+R3; 154R: LG+I+G4; 038R: LG+G4; 161L: LG+I+G4; 039R: LG+I+G4; 028R: LG+I+G4; 074L: LG+F+G4; 009L: LG+G4; 041L: LG+I+G4; 170L: WAG+F+R3; 093R: LG+I+G4; 077L: LG+F+I+G4; 011R: LG+I+G4). The outcomes of the SH-aLRT and bootstrap test (1000 replicates) are shown for the main nodes. Viruses are labelled according to their genus-level classification (*Ranavirus*: purple; *Lymphocystivirus*: red; *Megalocytivirus*: pink; *Chloridovirus*: orange; *Daphniairidovirus*: yellow; *Iridovirus*: green; *Decapodiridovirus*: turquoise; unassigned: white) and the virus identified in this study is indicated in red. Virus full names and accession numbers are available in Supplementary Table S2.

**Figure S2. Partial MCP sequence alignment of CaSpA-IV and its closest relatives.** Identities between sequence pairs are reported on the right.

Figure S1

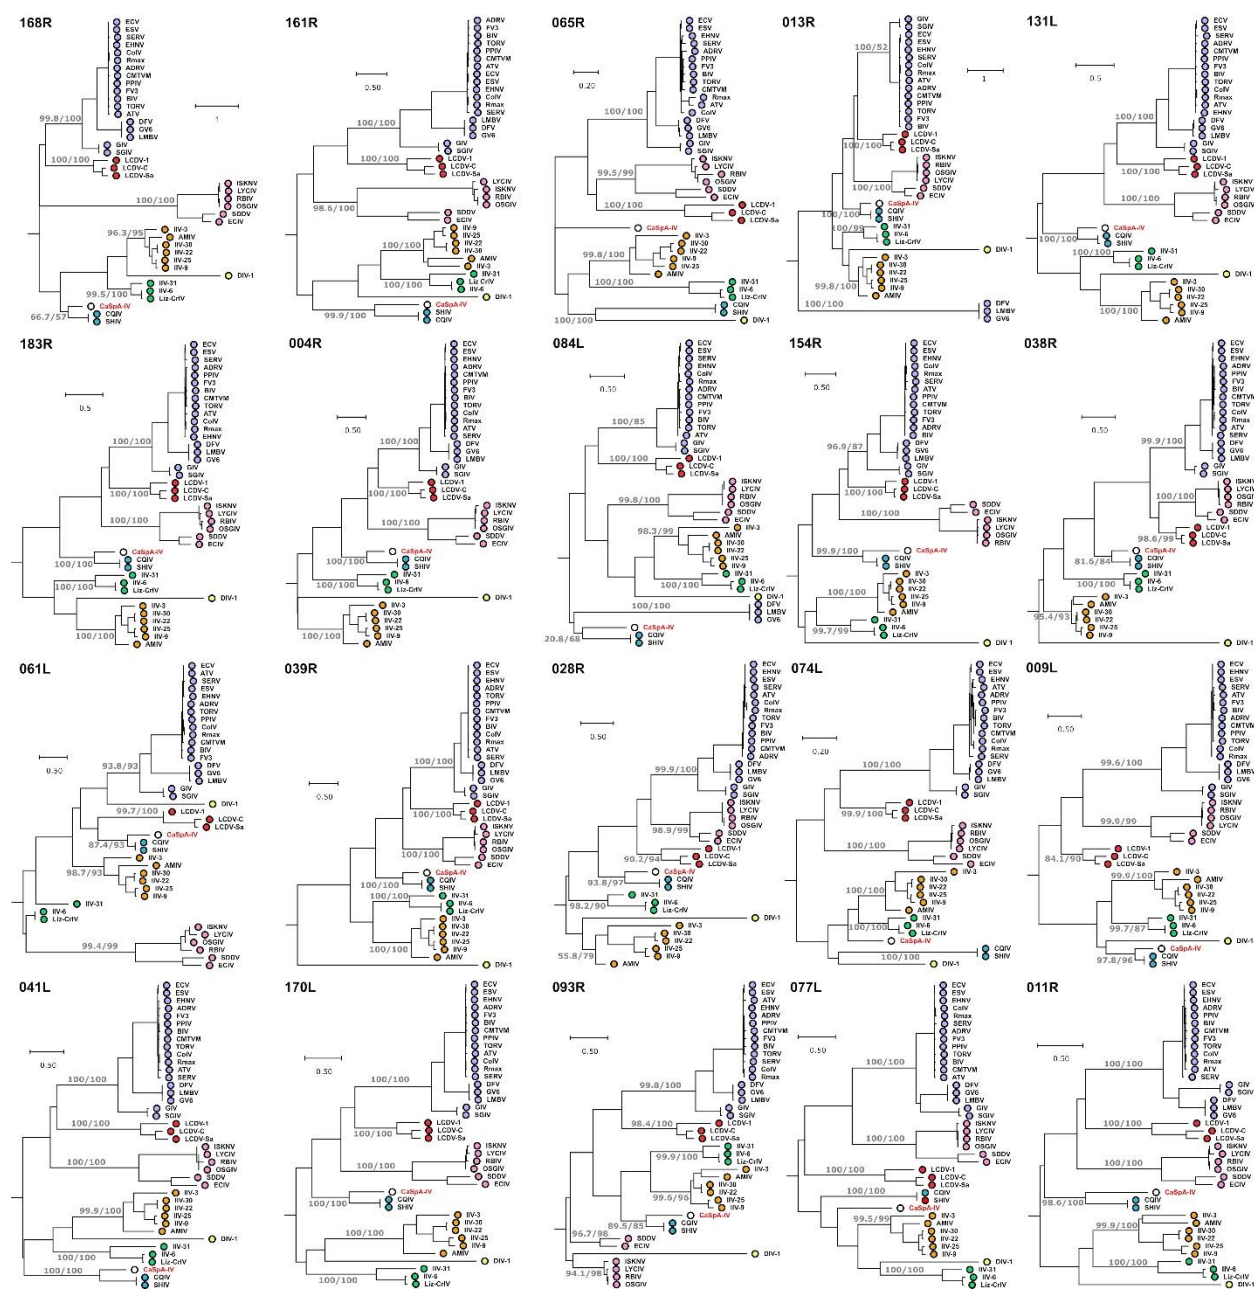

Figure S2.

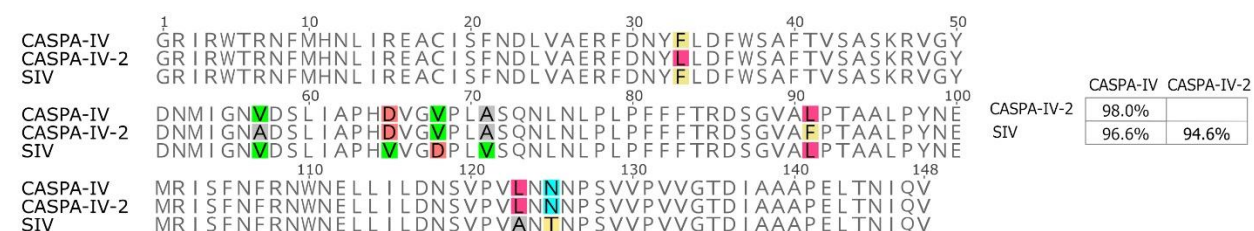

Supplement: s1 [file s1]
